# Supplementary material for: Left Atrial Appendage Occlusion versus Novel Oral Anticoagulation for Stroke Prevention in Atrial Fibrillation—One-Year Survival
Source: MDPI journal article supplement (doi:10.3390/jcm12206693), 2023-10-23
Supplement: s1 [file s1]

# **Left Atrial Appendage Occlusion versus Novel Oral Anticoagulation for Stroke Prevention in Atrial Fibrillation – One Year Survival**

*Tiosano et al.*

## Supplementary material

### Contents

|                                                                                                                     |   |
|---------------------------------------------------------------------------------------------------------------------|---|
| Table S1 – Baseline characteristics of study participants with CrCl ≤ 60 mL/min .....                               | 2 |
| Table S2 – The association between LAAO vs. NOACs and 1-year mortality – stratification by<br>distinct groups. .... | 3 |

Table S1 – Baseline characteristics of study participants with CrCl ≤ 60 mL/min

|                                                   | <b>LAAO</b><br>N=62 | <b>NOACs</b><br>N=217 | <b>P</b> |
|---------------------------------------------------|---------------------|-----------------------|----------|
| <b>Age</b>                                        | 79.0±7.97           | 79.5±11.5             | 0.736    |
| <b>Sex: Male</b>                                  | 31 (50.0%)          | 121 (55.8%)           | 0.510    |
| <b>Hypertension</b>                               | 50 (80.6%)          | 172 (79.3%)           | 0.953    |
| <b>Diabetes Mellitus</b>                          | 26 (41.9%)          | 81 (37.3%)            | 0.610    |
| <b>Ischemic Heart Disease</b>                     | 36 (58.1%)          | 108 (49.8%)           | 0.313    |
| <b>Congestive Heart Failure</b>                   | 25 (40.3%)          | 86 (39.6%)            | 1.000    |
| <b>Ejection fraction (%)</b>                      | 52.8±7.69           | 52.6±11.1             | 0.873    |
| <b>Prior bleeding</b>                             | 46 (74.2%)          | 168 (77.4%)           | 0.719    |
| <b>Prior stroke or TIA</b>                        | 31 (50.0%)          | 85 (39.2%)            | 0.168    |
| <b>CrCl</b>                                       | 35.8±20.0           | 37.3±17.0             | 0.610    |
| <b>CHA<sub>2</sub>DS<sub>2</sub>-VASc</b>         | 4.39±1.51           | 4.16±1.64             | 0.310    |
| <b>CHA<sub>2</sub>DS<sub>2</sub>-VASc =&gt; 4</b> | 47 (75.8%)          | 157 (72.4%)           | 0.705    |
| <b>HAS-BLED</b>                                   | 4.13±1.18           | 4.38±1.27             | 0.153    |
| <b>HAS-BLED =&gt; 4</b>                           | 45 (72.6%)          | 185 (85.3%)           | 0.034    |
| <b>Prior Aspirin treatment</b>                    | 23 (37.1%)          | 74 (34.1%)            | 0.775    |

LAAO: Left Atrial Appendage Occlusion; NOACs: Novel Oral Anticoagulants; TIA: Transient Ischemic Attack; CrCl: Creatinine Clearance, mL/min

Table S2 – The association between LAAO vs. NOACs and 1-year mortality – stratification by distinct groups.

|                      | <b>LAAO</b>    | <b>NOACs</b> |
|----------------------|----------------|--------------|
| <b>Under age 80</b>  | 6/174 (3.45%)  | 2/62 (3.23%) |
| <b>Age 80 plus</b>   | 26/168 (15.5%) | 3/52 (5.77%) |
| <b>Males</b>         | 14/202 (6.93%) | 4/70 (5.71%) |
| <b>Females</b>       | 18/140 (12.9%) | 1/44 (2.27%) |
| <b>CrCl 60 plus</b>  | 3/125 (2.40%)  | 3/52 (5.77%) |
| <b>CrCl under 60</b> | 29/217 (13.4%) | 2/62 (3.23%) |

LAAO: Left Atrial Appendage Occlusion; NOACs: Novel Oral Anticoagulants; CrCl: Creatinine Clearance
